# Supplementary material
Source: PubMed Central journal article supplement (PMC3365358)
Supplement: Supp_Data.pdf [file Supp_Data.pdf]

## Supplementary Data

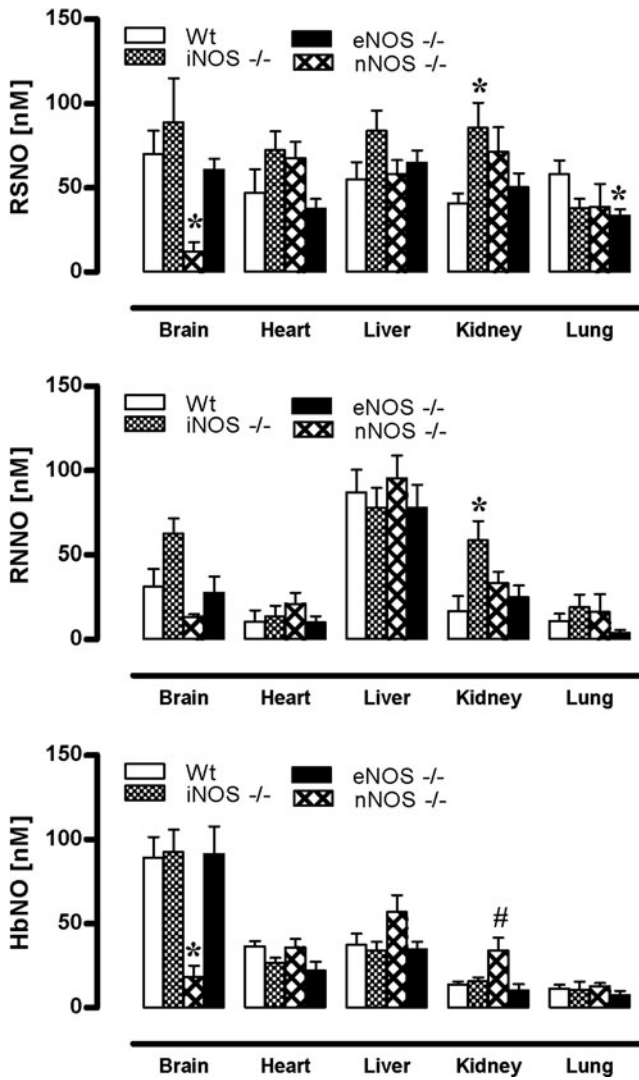

SUPPLEMENTARY FIG. 1. Contribution of different NOS isoforms to the steady-state concentrations of protein-bound NO signalling products in tissues of mice. RSNO, S-nitrosothiols; RNNO, N-nitroso species; HbNO, nitrosylheme products. See text for details.

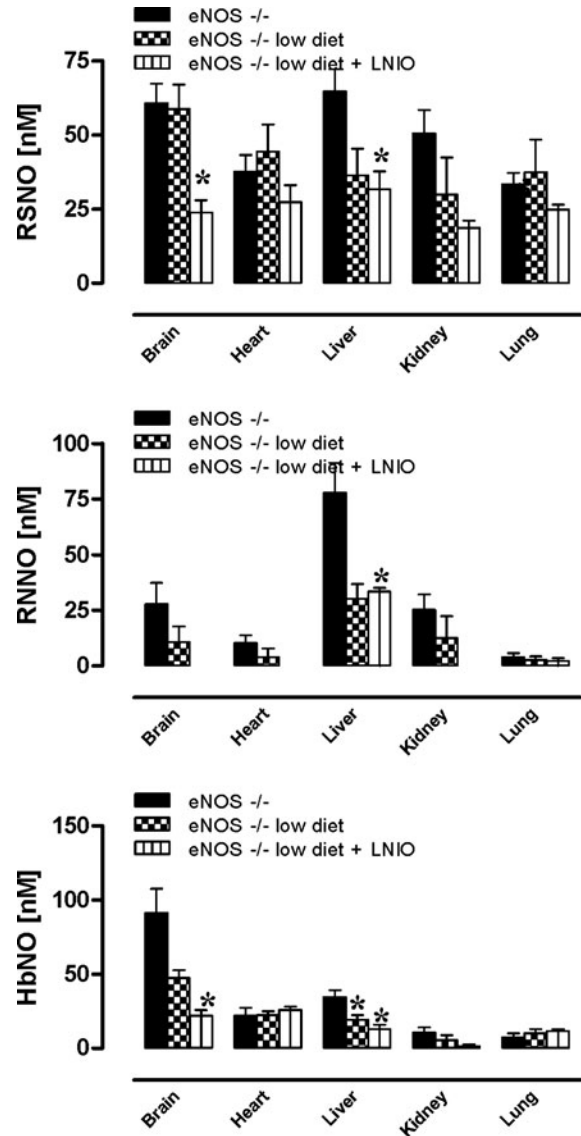

SUPPLEMENTARY FIG. 2. Contribution of diet and other NOS isoforms to the steady-state concentrations of protein-bound NO signalling products in eNOS<sup>-/-</sup> mice. RSNO, S-nitrosothiols; RNNO, N-nitroso species; HbNO, nitrosylheme products. See text for details.
